# Supplementary material
Source: PubMed Central journal article supplement (PMC6233099)
Supplement: pnas.1809969115.sapp.pdf [file pnas.1809969115.sapp.pdf]

## Supplementary Information for

### **Coding mutations in *NUS1* contribute to Parkinson's disease**

Ji-feng Guo, Lu Zhang, Kai Li, Jun-pu Mei, Jin Xue, Jia Chen, Xia Tang, Lu Shen, Hong Jiang, Chao Chen, Hui Guo, Xue-li Wu, Si-long Sun, Qian Xu, Qi-ying Sun, Piu Chan, Hui-fang Shang, Tao Wang, Guo-hua Zhao, Jing-yu Liu, Xue-feng Xie, Yi-qi Jiang, Zhen-hua Liu, Yu-wen Zhao, Zuo-bin Zhu, Jia-da Li, Zheng-mao Hu, Xin-xiang Yan, Xiao-dong Fang, Guang-hui Wang, Feng-yu Zhang, Kun Xia, Chun-yu Liu, Xiong-wei Zhu, Zhen-yu Yue, Shuai Cheng Li, Huai-bin Cai, Zhuo-hua Zhang, Ran-hui Duan & Bei-sha Tang\*

\*Correspondence author. Bei-sha Tang, Email: bstang7398@163.com

#### **This files includes:**

Materials and Methods

Figure S1 to S13

Table S1 to S9

Additional Data Files Content

References

## **Supplementary Information Text**

### **Materials and Methods**

## **Human Subjects**

Thirty-nine EOPD families of Han Chinese were recruited for exome sequencing, including 19 trios and 20 quads. The probands have the typical PD phenotypes, and their age at onset are less than 35 years. All the 39 families are from non-consanguineous unions. We ruled out the known genetic and environmental factors of PD, such as known genetic mutations and traumatic brain injury, in all 39 probands using multiple genetic and clinical examinations in our previous work (1-6). None of the first- and second-degree relatives of these 39 probands has PD or Parkinsonism. All the patients and their enrolled family members were subjected to the standard clinical neurological examination. Idiopathic PD was diagnosed according to the United Kingdom PD Brain Bank Criteria(7) by at least two neurologists, and the other healthy family members did not have any nervous or psychiatric system diseases. One family was removed due to its exceeding Mendelian error of 17%. A total of 1,852 sporadic patients (average age at onset= $48.57 \pm 12.50$  year; male=54.37%; and EOPD=45.36%) and 1,565 controls (average age= $50.73 \pm 16.68$  year and male=51.37%) were collected for the first genetic replication. A total of 3,237 sporadic patients (average age at onset= $58.05 \pm 10.10$  year; male=53.85%; and EOPD=9.36%) were collected for the second genetic replication. These subjects were recruited by the Department of Neurology of Xiangya Hospital, Xuanwu

Hospital, West China Hospital, Wuhan Union Hospital, The Second Affiliated Hospital of Zhejiang University School of Medicine and the State Key Laboratory of Medical Genetics of China. The protocol was approved by the Ethics Committee of Central South University, and written informed consent was collected from all the subjects.

### **Exome capture and sequencing**

The genomic DNA for each individual was hybridized by the NimbleGen 2.1M-probe sequence capture array (<http://www.nimblegen.com/products/seqcap/>) to capture the exonic DNA. We performed whole exome sequencing with 90bp pair-end reads using the Illumina HiSeq 2000 platform. The raw image files were processed using the standard Illumina Pipeline (version 1.3.4) for base calling with the default parameters.

### **Detection and confirmation of *de novo* mutations**

After removing the adapters, the raw reads in the FASTA format were aligned to the human reference genome (hg 19 version) by BWA (version 0.5.9-r16), and the PCR duplicates were marked by Picard (<http://broadinstitute.github.io/picard/command-line-overview.html>). We used the Genome Analysis Toolkit (GATK)(8) to perform the indel realignment, recalibrate the base quality score, and thereby obtained an 'Analysis-Ready' bam file for each individual. The SNVs and indels were jointly called by HaplotypeCaller in GATK for

every three or four members per family. We further removed the mutations with a Variant Quality Score logs odds ratio with a tranche sensitivity of less than 99.9% to alleviate other confounding effects.

According to the definition of *de novo* mutation, we selected the heterozygous variants in the offspring and homozygous reference in both parents. We designed the following quality criteria to remove false positive *de novo* mutations: a) all genotype Phred quality scores must be greater than 30, b) only one type of alternative allele was allowed, c) the read coverage of alternative alleles in the offspring was required to be greater than 4, d) more than 30% and less than 5% of the covered reads should be alternative allele for the offspring and parents, e) for the offspring, we required that  $PL(0/0) \geq 30$ ,  $PL(0/1) = 0$ , and  $PL(1/1) \geq 30$  (PL: Phred-scaled likelihoods for a given genotype), f) for both parents, we required that  $PL(0/0) = 0$ ,  $PL(0/1) \geq 30$ , and  $PL(1/1) \geq 30$ , g) two adjacent SNVs needed to be located at least 10 bp away, h) we removed indels in known structure variation regions, i) the *de novo* mutations were excluded if they were in dbSNP137, the Han Chinese of 1000 Genomes Project, or both of the two offspring in quads.

Sanger sequencing for both the mutation carriers and their parents validated these putative *de novo* mutations. The sequencing of each amplicon was performed with both forward and reverse primers. After revising the validated *de novo* mutations, we found that four criteria (c, d, e, and f) were crucial to achieve accurate results. Next, we relaxed these four criteria to rescue the missing *de novo* mutations due to the stringent parameters. For the offspring, a) the covered reads with alternative alleles required to be no less than 4,

b) the proportion of aligned reads with alternative alleles required to be greater than 25% for offspring, c) we required that  $PL(0/0) \geq 20$ ,  $PL(0/1) = 0$ , and  $PL(1/1) \geq 20$ . For the parents, we required that  $PL(0/0) = 0$ ,  $PL(0/1) \geq 20$ , and  $PL(1/1) \geq 20$ . We eliminated the mutations in intronic or intergenic regions based on the annotation of RefSeqGene (<http://www.ncbi.nlm.nih.gov/refseq/rsg/>). Four methods (SKIPPY(9), NetGene2(10), SplicePort(11) and Human Splicing Finder(12)) were applied to predict whether a *de novo* mutation could lead to transcript splicing. The *de novo* mutations were thought as the predicted splice sites if at least three of the abovementioned programs supported them.

To examine the effect of *de novo* mutations, we eliminated the influence of the disease susceptible inherited mutations that may lead to PD: a) rare (minor allele frequency <1% in dbSNP) homozygous or compound heterozygous mutations, b) rare heterozygous mutations on the maternal X chromosome and transmitted to the male proband, and c) rare deleterious variants (predicted by PolyPhen-2) inherited from one of the parents. We also collected the private inherited mutations (inherited from either one of the parents and observed in only one family) to compare with those *de novo* mutations. All the extracted inherited variants have a genotype Phred quality score greater than 20.

### **Brain-expressed genes and co-expression network in human brain**

We used the microarray and RNA-Seq data from the Allen Brain Atlas (<http://www.brain-map>) and BrainSpan (<http://www.brainspan.org/static/download.html>), respectively. The expressed genes in specific regions of the human brain were defined by the log intensity  $>6$  (microarray) or RPKM  $>5$  (RNA-Seq). We considered the genes if they expressed in at least one of the SNc or STR regions for PD. We calculated the gene co-expression based on the average Pearson correlations of the 12 new candidate genes from the brain developmental expression data in BrainSpan and its statistical significance was evaluated by 100,000 random simulations, each of which contained 12 genes.

### **Prediction of microRNA targets**

The predicted microRNA targets with a good mirSVR were obtained from the [microrna.org](http://microrna.org)(13), and we applied a hypergeometric test to evaluate the co-targets of the 12 candidate genes and PD known causal genes by the same microRNAs. We performed 10,000 random simulations to calculate the corrected P values and evaluate the empirical distribution of the selected genes as the targets of hsa-miR-125a-3p. Twelve genes were randomly selected for each simulation, and the number genes were targeted by hsa-miR-125a-3p calculated.

### **Protein-Protein interaction networks**

The protein-protein interaction networks were constructed for both the 12 new candidate genes and PD known causative genes based on DAPPLE (Disease Association Protein-Protein Link Evaluator)(14). We further explored the differential expression of the genes

involved in the protein-protein interaction networks by GEO2R (<http://www.ncbi.nlm.nih.gov/geo/geo2r/>) on the collected gene expression data from PD known genetic mouse models, MPTP-treated mouse models, and control mice from GEO. The smallest P value from the selected gene expression datasets is presented (**Table S6**).

### **Gene ontology and KEGG pathway enrichment**

We annotated the 12 new candidate genes based on Gene ontology (GO) (<http://www.geneontology.org>), the KEGG pathway database (<http://www.genome.jp/kegg/pathway.html>), and calculated their functional enrichment by a hypergeometric test. The P values for the enrichment of GO and KEGG were corrected by the Bonferroni correction and False discovery rate, respectively. The nonsynonymous *de novo* mutations in the siblings were used to calculate the enrichment of GO and KEGG.

### **MIPs design and procedure**

MIPgen (<https://github.com/shendurelab/MIPGEN>)(15) designed MIPs. All the designed MIPs for the candidate genes exons are provided in the **Dataset S5**. Multiplex capture, amplification procedure and high-throughput sequencing data analysis followed the protocol proposed by Nuttle et al.(16, 17). The PCR products were sequenced by Illumina HiSeq 3000 with 150bp paired-end reads.

### **Statistical analysis for case-control replications**

The paired-end reads sequenced from MIPs and exome sequencing were aligned to hg19 human reference genome and followed by variants calling with GATK. We kept the high confident candidate variants (genotype quality $\geq$ 20, sequencing depth $\geq$ 6X and the proportion of the reads with alternative alleles $\geq$ 0.3) for further association analysis. The association of single variants was evaluated by Fisher's exact test in PLINK(18) after removing the variants that satisfied the thresholds in Hardy Weinberg disequilibrium ( $P < 10^{-4}$ ), minor allele frequency ( $< 0.01$ ), and genotype missing rate ( $> 0.05$ ). The enrichment of rare nonsynonymous variants (minor allele count  $\leq 3$  in controls) in a given gene was calculated by Fisher's exact test. We assumed 100 rare variants (0.05%-1% for minor allele frequency) were involved in the candidate genes and required gene-based p-value surpassing 0.004 (0.05/12). The power reached 99.97% for 5,089 patients by using non-central chi-square approximation in KATSP (19)

### **Real-time PCR and reverse transcription-PCR**

PBMCs were isolated from EDTA blood by density gradient centrifugation (Histopaque, Sigma-Aldrich). Total RNA isolated using Trizol reagent (Invitrogen, 15596-018) was converted to cDNA by the Verso™ cDNA Kit (Thermo Scientific, AB1453B) following the manufacturer's instruction. SYBR Green qPCR Master Mix (2x) (Thermo Scientific, #K0251) was used for quantitative real-time PCR amplification using a CFX96 Real-Time PCR Detection System (BiO-RAD) and corresponding software (Applied Biosystems,



Foster City, USA). Primers for *NUS1* were 5' - AGCCTCGTGGTGTGGTGTAT- 3' (forward) and 5' -GCCCAGAAGTTCTTGCTGTT -3' (reverse). PCR was performed with 1 cycle at 50°C for 2 min and 95°C for 10 min, followed by 40 cycles at 95°C, 15 s, and 60°C, 1 min. Gene expression was normalized to actin, and relative mRNA levels were calculated based on the comparative CT method. Reverse transcription PCR primer sequences are 5' - CCGGAAGATGGAAAAGCAGA- 3' (forward) and 5' -TCCTTTCCTCCACAAGCCT - 3' (reverse). PCR products were separated on a 1.2% agarose gel. Following electrophoresis, DNA bands were cut out of the agarose gel and sequence the DNA samples.

### ***Drosophila* Stocks**

Two Tango14 RNAi fly lines were obtained from the Bloomington *Drosophila* Stock Center (stock number: 31571) and Vienna *Drosophila* Resource Center (stock number: v42499), respectively. The mRNA expression levels of these two RNAi lines under the driver of pan-neural Elav-GAL4 were quantified by qPCR. The knockdown efficiencies of these two RNAi lines were 64% (31571) and 50% (v42499) respectively. GAL4 flies were obtained from the Bloomington *Drosophila* Stock Center. Flies were raised at 25°C according to standard procedures.

### **Climbing ability**

Groups of ten 3-day-old and 30-day-old male *NUSI* knockdown flies driven by *Elav-Gal4* were gently tapped to the bottom of the container and allowed to climb up the line (15 cm) to assay their climbing ability. The average climbing time for 3 trials ( $\pm$  standard deviation (s.d.) was calculated for each genotype.

### **Dopamine Measurements**

Whole-mount immunohistochemistry for TH staining was performed as described (20). Immunohistochemistry for TH staining used anti-TH antiserum Ab152 (1:100, Millipore), 3-day-old and 30-day-old male flies induced by dopaminergic neuron-specific TH-Gal4, and PPL1, PPM1/2, PPM3 clusters were quantitated from confocal images.

HPLC analysis of dopamine levels was performed as described (21). For sample preparation, 3-day-old and 30-day-old male fly's heads were dissected out and homogenized in 0.1 M perchloric acid. The homogenate was frozen on dry ice and stored at  $-80^{\circ}\text{C}$  before HPLC analysis. Mean $\pm$ s.d. were from  $n=3$  experiments.

### **TUNEL assay**

Analysis of the apoptotic signal in 30-day-old male flies driven by *Elav-Gal4* was previously described by Huang et al. (22). TUNEL analysis was detected using the in situ cell death detection kit (Roche).

### **Proband clinical description**

The characteristics and phenotypic variables of the probands in 39 EOPD families (Patients cohorts) shown in **Dataset S6**. Multiple genetic and clinical examinations in our preliminary work are also shown in the same table.

### **Sample Cohort**

All the PD patients and their family members were subjected to a standard clinical neurological examination. The diagnosis of idiopathic PD was made according to the United Kingdom PD Brain Bank Criteria. The family members did not have any nervous or psychiatric system diseases. All the probands had undergone brain MRI examinations that showed no evident lesions in the brain, and some of them had received a PET scan that showed decreased<sup>11</sup> C-CFT uptake in the putamen (**Fig. S13**). We excluded those patients with aberrant short tandem repeat expansions in *SCA2*<sup>2</sup>, *SCA3*<sup>2</sup>, *SCA17*<sup>3</sup>, *C9orf72*<sup>4</sup>, as well as the rearrangements and point and indels mutations in *Parkin*<sup>5</sup>, *PINK1*<sup>5</sup>, and *DJ-1*<sup>5</sup>, and point and indels mutations in *FBXO7*<sup>6</sup>, *PLA2G6*<sup>7</sup>, *GCH1*, *TH*, *SPR* and *ATP7B* (unpublished data).

*SALSA MLPA kits P051-C3 also assessed SNCA, ATP13A2, GCH1, and TH rearrangements and P099-C2 (MRC Holland, Amsterdam, The Netherlands) (unpublished data). We also excluded individuals carrying rare variants with large odds ratios in GBA<sup>8</sup>, LRRK2<sup>9</sup>, and SMPD1<sup>10</sup>.*

All 39 probands were collected from Han Chinese non-consanguineous families, and none of the first- and second-degree relatives of the 39 probands had PD or Parkinsonism. We chose only young patients with an age at onset of at most 35 years (**Dataset S6**), because they may have had fewer chances to be affected by environmental factors, more possibility affected by genetic factors, and more difficulties to getting married than the late onset patients. All the patients involved in our study had no known history of heavy metal/pesticide/carbon monoxide exposure, drug abuse, or antipsychotic drug use, and were not previously diagnosed with diabetes, stroke or encephalitis.

### **Detection and validation of *de novo* mutations**

We applied a two-stage strategy to detect *de novo* mutations. In the first stage, we used stringent quality criteria (**Materials and Methods**) to eliminate false positive mutations. *De novo* SNVs 91.94% (57/62) and indels 28.57% (2/7) were confirmed after validation with Sanger sequencing.

To estimate the number of *de novo* mutations missing in the first stage, we relaxed the quality criteria, which resulted in the addition of 32 *de novo* SNVs and 1 indel. Of these additions, only one *de novo* SNV (3.13%) and zero indels (0%) were validated, suggesting most of the *de novo* mutations were identified.

### **Known causative PD genes**

To date, 20 genes are reported to cause PD/Parkinsonism causative through monogenic inheritance: *LRRK2*, *PARK2* (*Parkin*), *PLA2G6*, *DNAJC13*, *GIGYF2*, *FBXO7*, *SYNJ1*, *HTRA2*, *EIF4G1*, *SNCA*, *DNAJC6*, *VPS35*, *ATP13A2*, *PINK1*, and *PARK7* (*DJ-1*), *UCHL1*, *RAB39B* *CHCHD2*, *VPS13C* and *TMEM230*<sup>11-16</sup>.

### **Calculation of exome-wide *de novo* mutation rates**

The *de novo* mutation rates can fluctuate and are influenced by childbearing age of the parents, sample size, and other factors. Based on the quality thresholds used to explore *de novo* mutations, the number of nucleotides covered at least 8 times (the lowest depth of our validated *de novo* mutation) for all the members of each family were used as denominator. The total number of the confirmed *de novo* SNVs divided by the denominator was the observed mutation rates.

### **Comparison with private inherited mutations**

Private inherited mutations are defined herein as inherited mutations that are unique family and inherited from one of the parents. We identified 22,866 private inherited mutations in the 38 EOPD families; of them, 13,576 were nonsynonymous, 8,612 were synonymous, whereas 285 SNVs were nonsense, 17 were located in canonical splice sites, and 161 were indels.

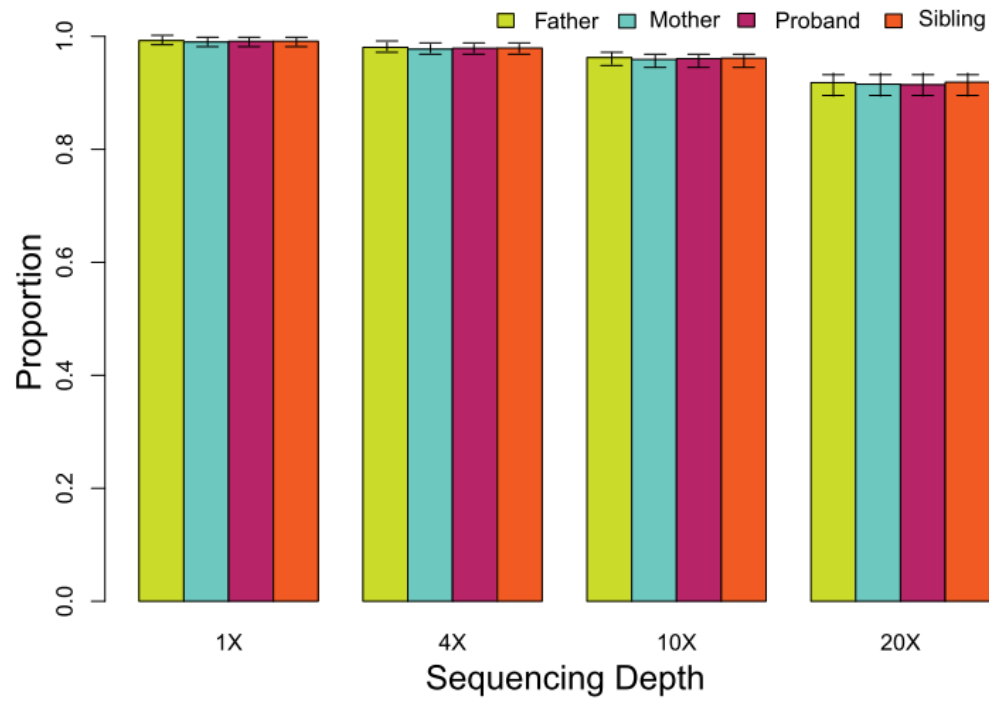

**Fig. S1.** Sequencing coverage of the exonic target regions. The average proportions of read depth in the target regions at 1X, 4X, 10X, and 20X for all parents, probands and their siblings.

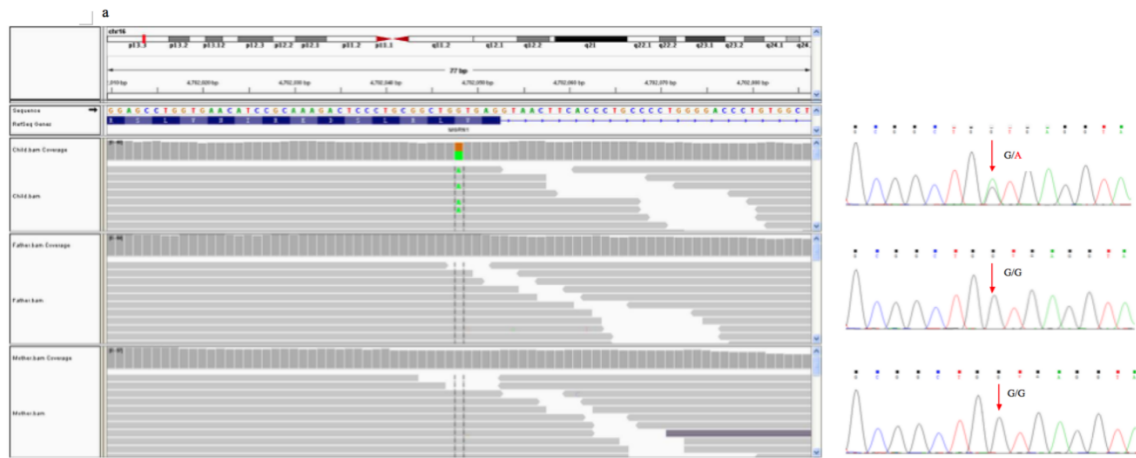

(a) SNV

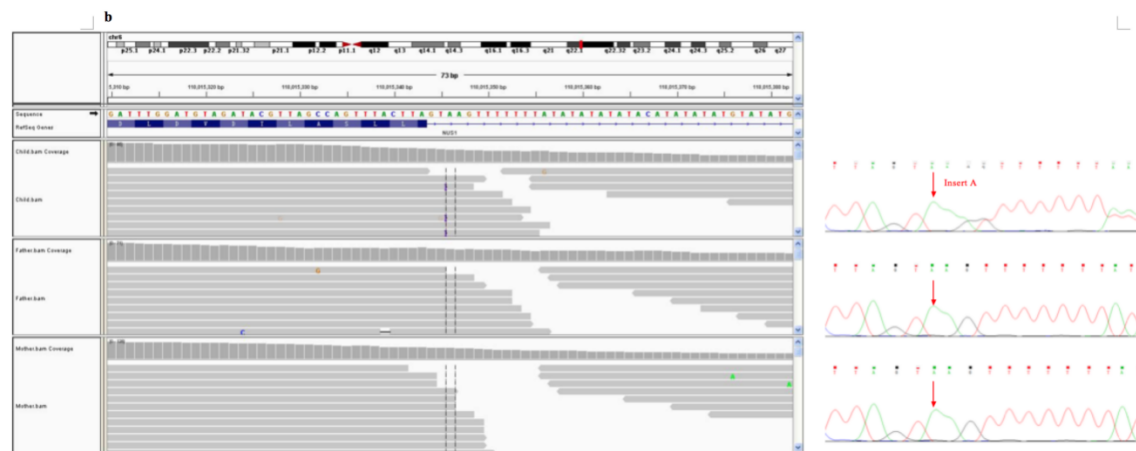

(b) Indel



**Fig. S2.** An example for Sanger sequencing validation of *de novo* SNVs and indels showing confirmation of *de novo* mutations in probands. Left subfigures: IGV (Integrative Genomics Viewer) browser view of *de novo* mutations in (a) *MGRN1* and (b) *NUS1*. Top panel shows the mutation location indicated by a red tag. Middle panel shows the reference sequence and translated amino acids. Bottom panel represents the reads pileup for the proband, father, and mother. Right subfigures: Sanger sequencing traces. Red arrow in top panel indicates *de novo* mutation in probands, the middle and bottom ones are for the parents, respectively.

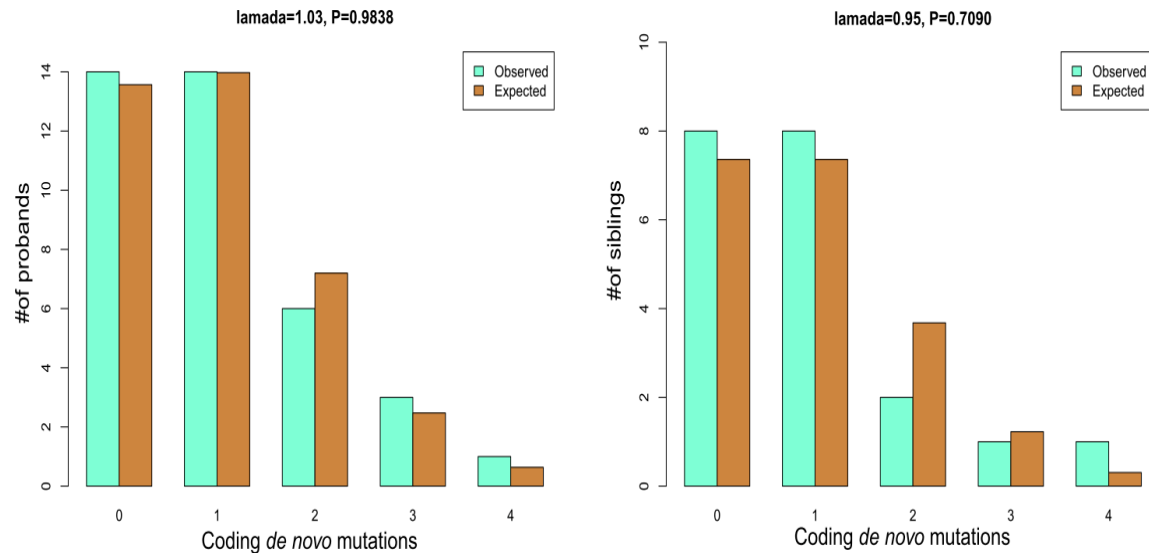

**Fig. S3.** The number of *de novo* mutations in probands and siblings follows Poisson distribution (Probands:  $P=0.98$ , Siblings:  $P=0.71$ ). The average number of *de novo* mutations for probands and siblings are 1.03 and 0.95, respectively.

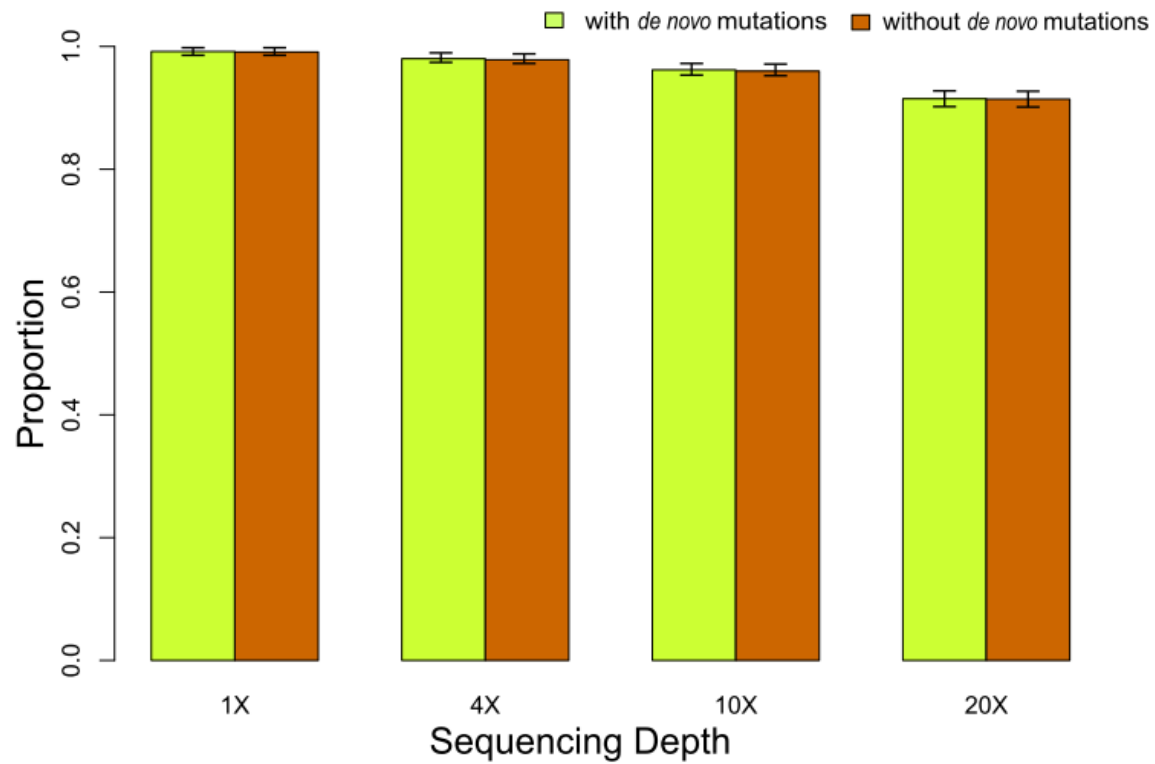

**Fig. S4.** Sequencing depth comparison for the samples with or without *de novo* mutations in the target regions. No sequencing depth bias was observed between probands and siblings.

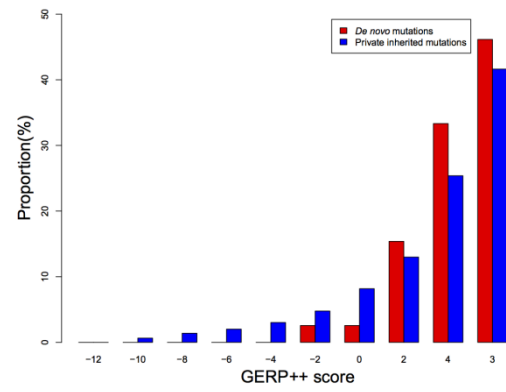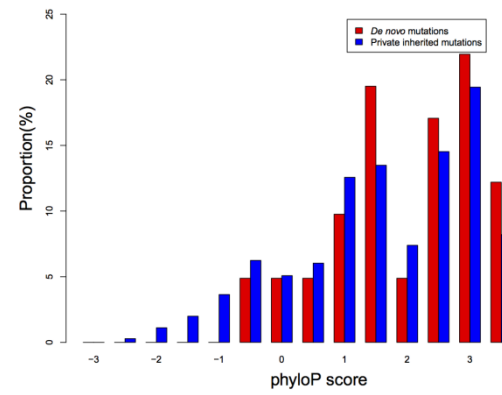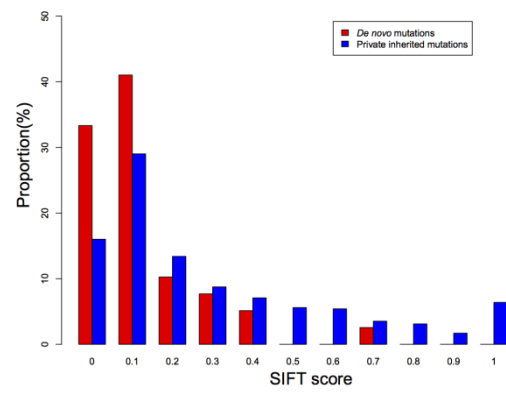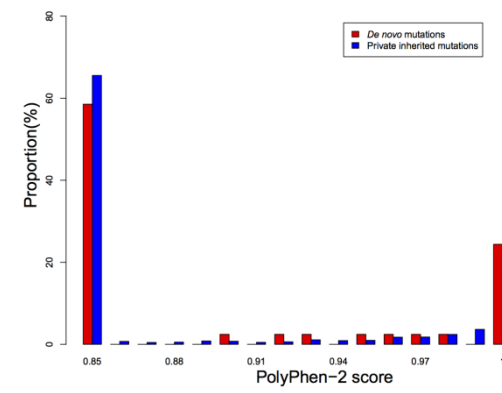

## A. Probands

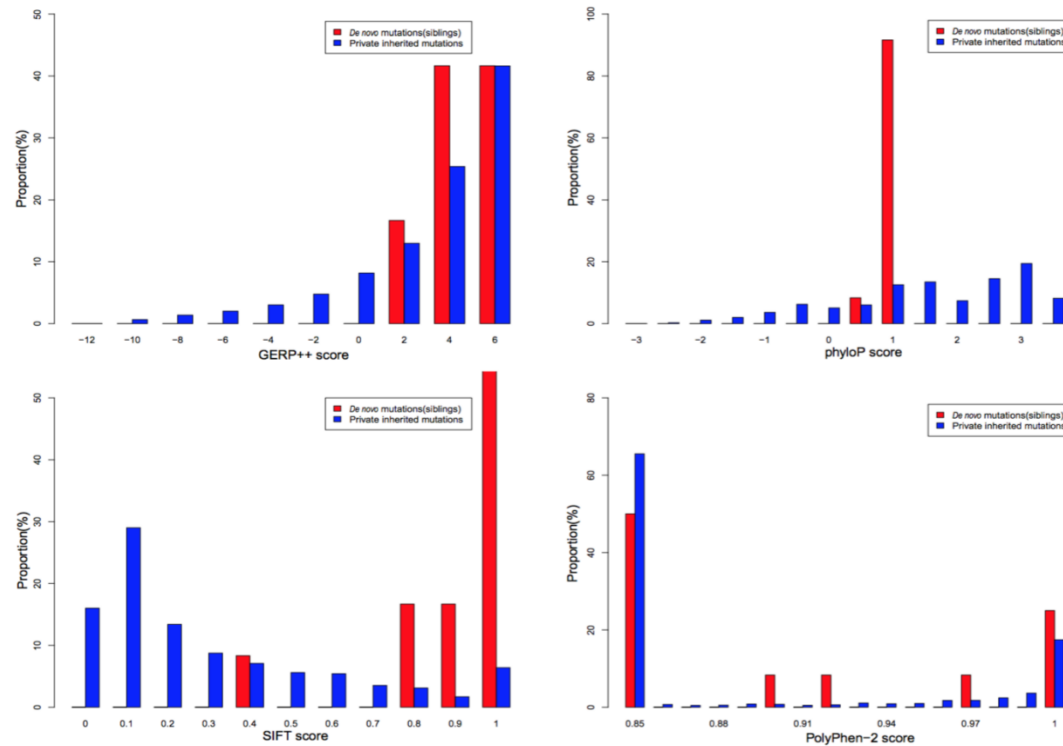

## B. Siblings

**Fig. S5.** Assessment of the potential pathogenicity of *de novo* mutations identified in the probands and siblings in terms of the conserved and deleterious amino acid changes. **A.** Comparison of the distributions of GERP++ scores ( $P=0.14$ ), phyloP scores ( $P=0.04$ ), SIFT scores ( $P=2.18E-05$ ) and PolyPhen-2 scores ( $P=0.03$ ) for the *de novo* mutations and private inherited variants found in the probands. **B.** Comparison of the distributions of GERP++ scores ( $P=0.93$ ), phyloP scores ( $P=1.00$ ), SIFT scores ( $P=0.07$ ) and PolyPhen-2 scores

(P=0.99) for the *de novo* mutations and private inherited variants found in the siblings. The P values were calculated by the Wilcoxon rank sum test.

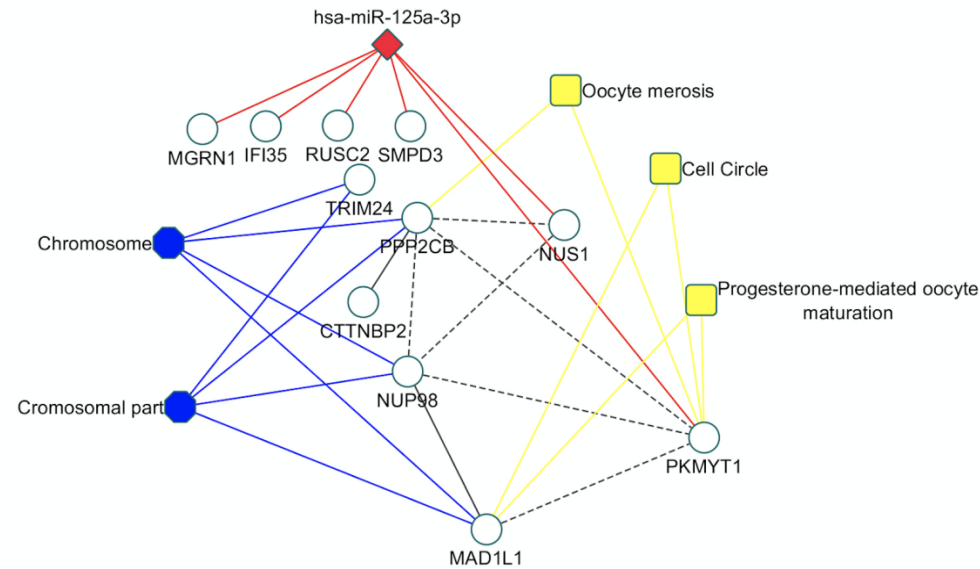

**Fig. S6.** Connectome of the 12 new candidate genes with *de novo* mutations. Six genes (*NUP98*, *MAD1L1*, *PPP2CB*, *PKMYT1*, *CTTNBP2*, and *NUS1*) are involved in the Protein-Protein interaction network predicted by DAPPLE. The solid black lines represent direct interactions, and the dashed black lines indicate indirect interactions. The candidate genes significantly enriched in two gene ontology terms, as shown by blue lines: chromosome ( $P_{\text{corrected}}=6.78\text{E-}03$ ) and chromosomal part ( $P_{\text{corrected}}=1.15\text{E-}02$ ). The KEGG pathway enrichment analysis discovered three significant pathways, shown with yellow lines: progesterone-mediated oocyte maturation

( $P_{\text{corrected}}=0.03$ ), cell cycle ( $P_{\text{corrected}}=0.03$ ), and oocyte meiosis ( $P_{\text{corrected}}=0.03$ ). Overall, 6 genes with protein-altering *de novo* mutations were predicted as the targets of hsa-miR-125a-3p ( $P_{\text{corrected}}= 6.50E-03$ ), as shown by red lines.

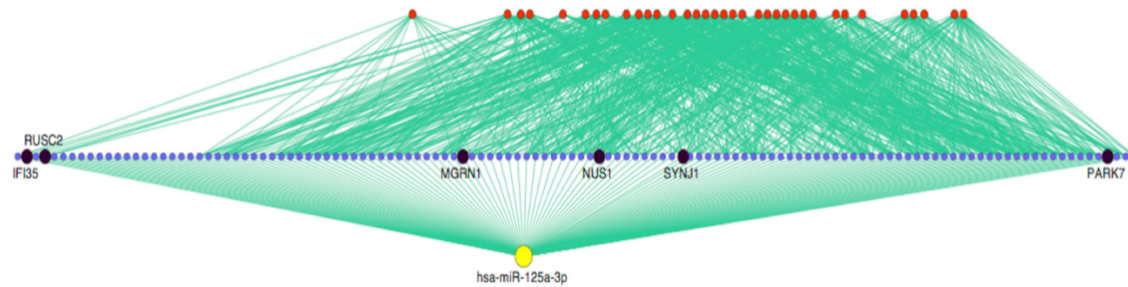

**Fig. S7.** The interaction network between has-miR125a-3p and its targets. Besides hsa-miR-125a-3p (yellow circle), other known PD-related microRNAs (red circle, **Dataset S3**) were also included. The selected targeted genes (blue and black circles) contained validated targets of hsa-miR-125a-3p and its targets predicted in our study (*PKMYT1*, *NUS1*, *SMPD3*, *MGRN1*, *RUSC2* and *IFI35*). Six genes that were co-targets of has-miR-125a-3p and other know PD-related microRNA were highlighted as black circles.

```

Homo sapiens      UGCCAGUCUCUAGGUCCCUGAGACCCUUUAACCUUGUGAGGACAUC CAGGGUCACAGGUGAGGUUCUUGGGAGCCUGGCGUCUGGCC
Pan troglodytes  -GCCAGUCUCUAGGUCCCUGAGACCCUUUAACCUUGUGAGGACAUC CAGGGUCACAGGUGAGGUUCUUGGGAGCCUGGUGUCUGGCC
Pongo pygmaeus   UGCCAGUCUCUAGGUCCCUGAGACCCUUUAACCUUGUGAGGACAUC CAGGGUCACAGGUGAGGUUCUUGGGAGCCUGGCGUCUGGCC
Macacaulatta     UGCCAGUCUCUGGGUCCCUGAGACCCUUUAACCUUGUGAGGACAUC CAGGGUCACAGGUGAGGUUCUUGGGAGCCUGGCGUCUGGCC
Mus musculus     -----CUGGGUCCCUGAGACCCUUUAACCUUGUGAGGACGUC CAGGGUCACAGGUGAGGUUCUUGGGAGCCUGG-----
Rattus norvegicus UGCCGGCCUCUGGGUCCCUGAGACCCUUUAACCUUGUGAGGACGUC CAGGGUCACAGGUGAGGUUCUUGGGAGCCUGGCGCCUGGC-
Equus caballus   -----CUGGGUCCCUGAGACCCUUUAACCUUGUGAGGACAUC CAGGGUCACAGGUGAGGUUCUUGGGAGCCUGG-----
** *****

```

**Fig. S8.** Multiple sequence alignment and conservation of hsa-miR125a-3p among seven vertebrate species. The region in blue defines the sequence of hsa-miR125a-3p, \*denotes conserved positions. The multiple sequence alignment was obtained from miRviewer (<http://people.csail.mit.edu/akiezun/microRNAviewer/>).



Simulation based on highly expressed *de novo* protein altering genes in STR

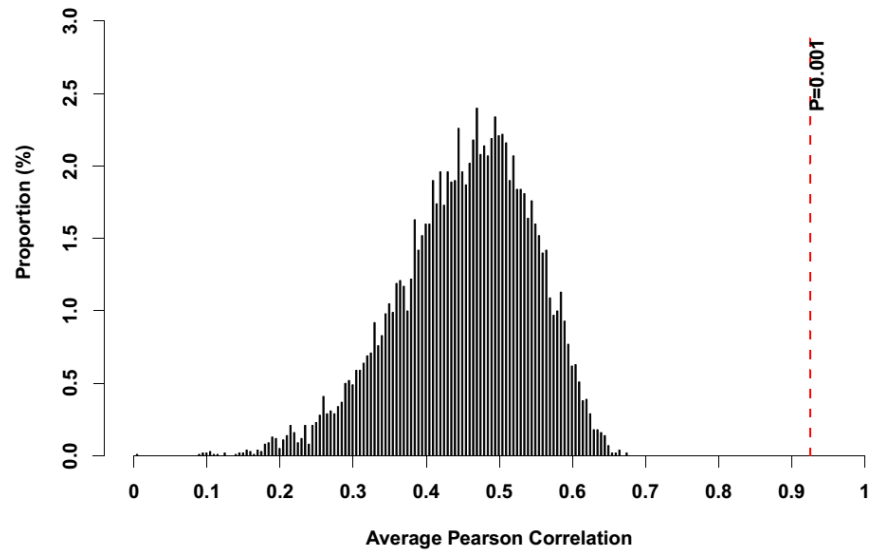

**Fig. S9.** The empirical distribution and P values for gene co-expression of the 12 PD new candidate genes. The empirical distribution was generated from 100,000 simulations, each contained randomly selected 12 genes. The gene co-expression for each network was calculated by average Pearson correlation. The red dashed line represents the co-expression of 12 PD new candidate genes. All the gene expressions were extracted from BRAINSPAN.

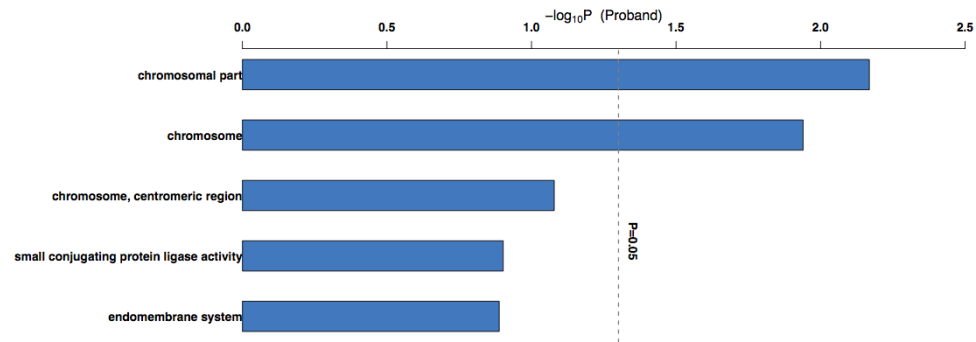

### A. Gene Ontology enrichment for the probands

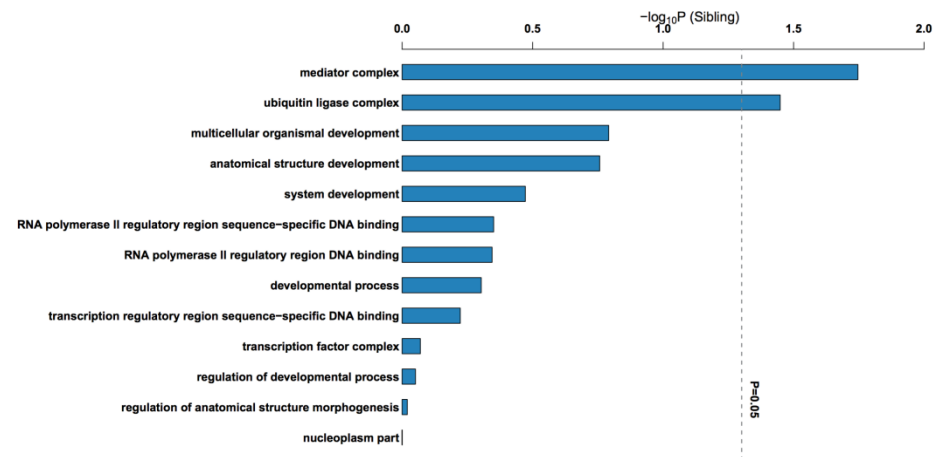

### B. Gene Ontology enrichment for the siblings

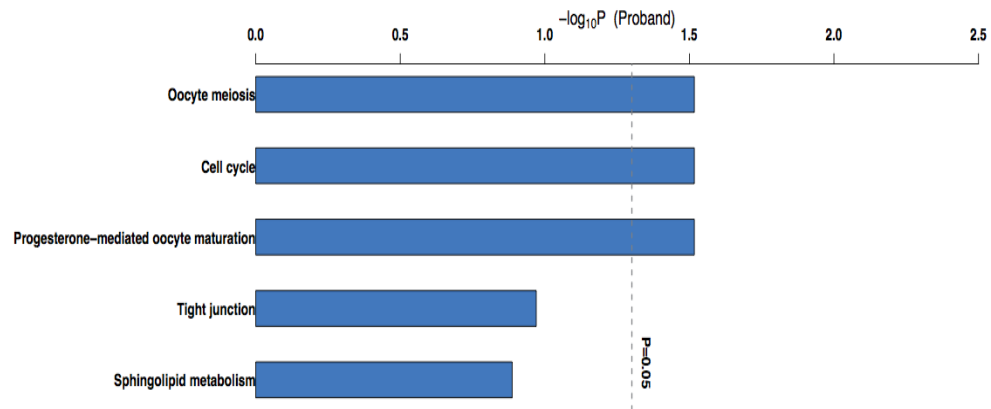

### C. KEGG pathway enrichment for the probands

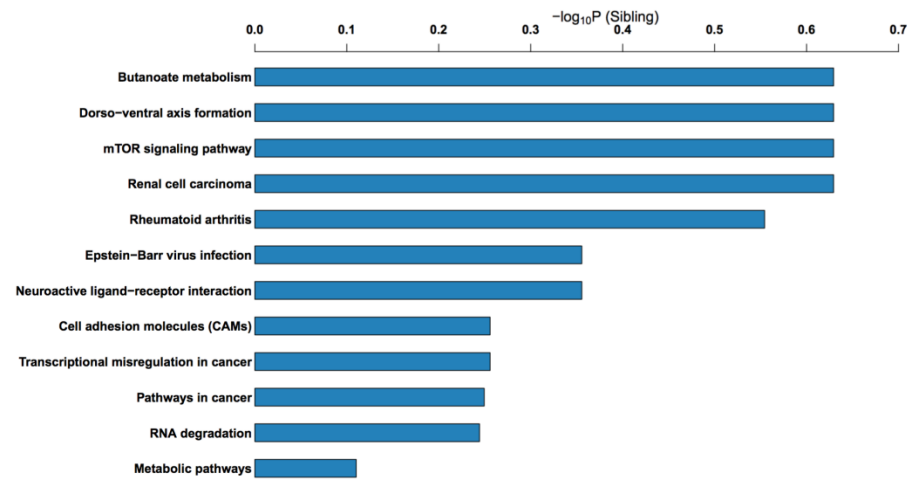

### D. KEGG pathway enrichment for the siblings

**Fig. S10.** Gene Ontology and KEGG pathway enrichment for the 12 new candidate genes in the probands and *de novo* altering genes in the siblings. Two GO terms (chromosome,  $P_{\text{corrected}}=6.78\text{E-}03$ ; chromosomal part,  $P_{\text{corrected}}=1.15\text{E-}2$ ) and three KEGG pathways (progesterone-mediated oocyte maturation  $P_{\text{corrected}}=0.03$ ; cell cycle,  $P_{\text{corrected}}=0.03$ ; oocyte meiosis,  $P_{\text{corrected}}=0.03$ ) are significant in the probands. Two GO terms (mediator complex,  $P_{\text{corrected}}=1.79\text{E-}2$ ; ubiquitin ligase complex,  $P_{\text{corrected}}=3.56\text{E-}2$ ) and zero KEGG pathways are significant in the siblings. Chromosome: *TRIM24*, *NUP98*, *MAD1L1*, *PPP2CB*; chromosomal part: *TRIM24*, *NUP98*, *MAD1L1*, *PPP2CB*; progesterone-mediated oocyte maturation: *MAD1L1*, *PKMYT1*; cell cycle: *MAD1L1*, *PKMYT1*; oocyte meiosis: *PPP2CB*, *PKMYT1*; mediator complex: *MED12*, *MED23*; ubiquitin ligase complex: *MED12*, *MED23*, *FBXL15*.

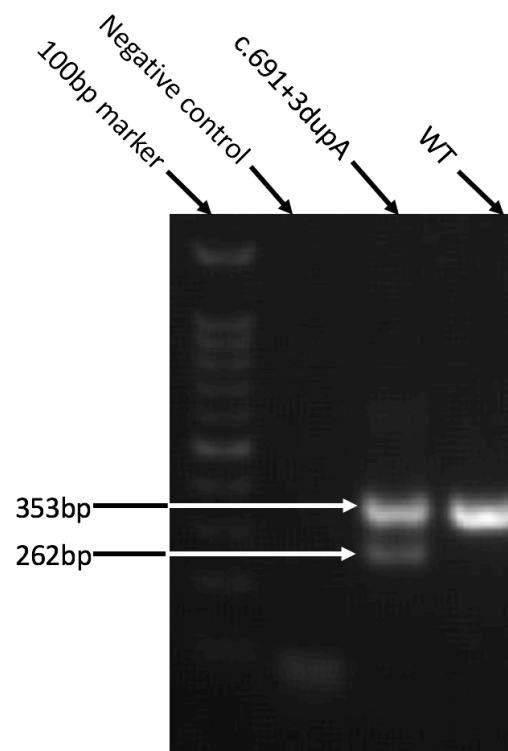

**Fig. S11.** Agarose gel electrophoresis of RT-PCR fragments produced by mRNAs extracted from patient and age-matched healthy control.

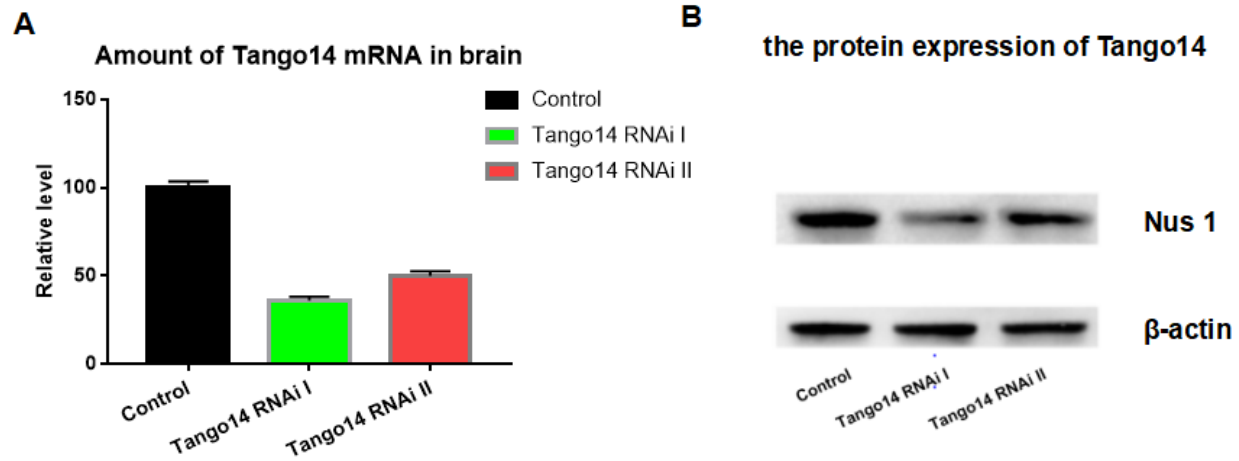

**Fig. S12.** The expression of Tango14 in the two Tango14 RNAi lines. A: mRNA expression level; B: protein expression level

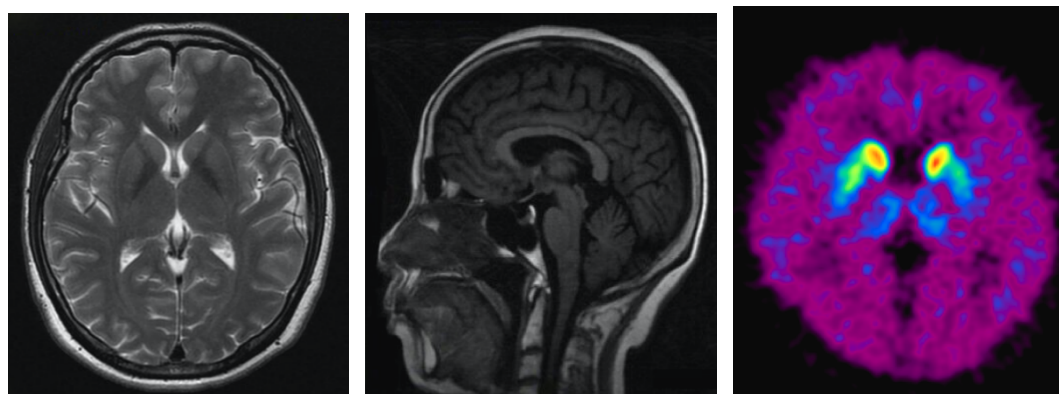

**Fig. S13.** Examples of brain MRI and PET examination of the EOPD probands. MRI (T2-weighted and T1-weighted) shows one patient with no evident lesions in the brain. PET results exhibit reduction of DAT binding ( $^{11}\text{C}$ -CFT) in posterior putamen nucleus in another patient.

|                                                    | Mean $\pm$ Standard deviation |
|----------------------------------------------------|-------------------------------|
| Read length (bp)                                   | 90                            |
| Number of individuals                              | 137                           |
| Raw reads (Gb)                                     | 10.89 $\pm$ 1.40              |
| Mapped reads (Gb)                                  | 10.80 $\pm$ 1.38              |
| Mapped reads on target region (Gb)                 | 3.95 $\pm$ 0.49               |
| Mapping rate (%)                                   | 98.39 $\pm$ 0.31              |
| Average sequencing depth (fold)                    | 61.49 $\pm$ 7.63              |
| Proportion of target region covered $\geq$ 1X (%)  | 99.13 $\pm$ 0.19              |
| Proportion of target region covered $\geq$ 4X (%)  | 97.90 $\pm$ 0.33              |
| Proportion of target region covered $\geq$ 10X (%) | 96.08 $\pm$ 0.49              |
| Proportion of target region covered $\geq$ 20X (%) | 91.63 $\pm$ 1.63              |

**Table S1.** The general information of exome sequencing data from 39 EOPD families



| Fam_id | Pheno   | Chr   | Type | Position* | Ref | Alt | AAC      | ExAC   | gnomAD | Conservation <sup>#</sup> | Function              | Gene    |
|--------|---------|-------|------|-----------|-----|-----|----------|--------|--------|---------------------------|-----------------------|---------|
| Quad1  | Proband | chr12 | SNV  | 6483742   | C   | T   | p.G93S   | -      | -      | Y                         | nonsynonymous         | SCNN1A  |
| Quad2  | Proband | chr11 | SNV  | 3697839   | T   | G   | p.S1695S | -      | -      | Y                         | splicing <sup>+</sup> | NUP98   |
| Quad4  | Proband | chr19 | SNV  | 31770010  | G   | A   | p.T230M  | -      | -      | Y                         | nonsynonymous         | TSHZ3   |
| Quad5  | Proband | chr14 | SNV  | 21870167  | T   | G   | p.R1058R | -      | -      | Y                         | synonymous            | CHD8    |
| Quad8  | Proband | chr12 | SNV  | 52307354  | C   | T   | p.P109S  | -      | -      | N                         | nonsynonymous         | ACVRL1  |
| Quad10 | Proband | chr17 | SNV  | 79180926  | A   | G   | p.L129P  | -      | -      | Y                         | nonsynonymous         | CEP131  |
| Quad10 | Proband | chr16 | SNV  | 68404992  | C   | T   | p.V365M  | -      | -      | Y                         | splicing <sup>+</sup> | SMPD3   |
| Quad11 | Proband | chr5  | SNV  | 56180628  | C   | T   | p.Y1319Y | -      | 4.1E-6 | Y                         | synonymous            | MAP3K1  |
| Quad13 | Proband | chr5  | SNV  | 150889595 | A   | G   | p.Y4016H | -      | -      | N                         | nonsynonymous         | FAT2    |
| Quad14 | Proband | chr11 | SNV  | 20483714  | G   | T   | NA       | -      | -      | Y                         | splicing              | PRMT3   |
| Quad14 | Proband | chr2  | SNV  | 219562211 | C   | T   | p.A929A  | 9.1E-5 | 1E-4   | N                         | synonymous            | STK36   |
| Quad15 | Proband | chr19 | SNV  | 691872    | T   | C   | p.I123V  | 8.4E-6 | 8.1E-6 | Y                         | nonsynonymous         | PRSS57  |
| Quad16 | Proband | chr7  | SNV  | 2255841   | T   | A   | p.R254W  | -      | -      | Y                         | nonsynonymous         | MAD1L1  |
| Quad16 | Proband | chr17 | SNV  | 41158986  | G   | A   | NA       | 8.2E-6 | 8.1E-6 | Y                         | splicing              | IFI35   |
| Quad16 | Proband | chr16 | SNV  | 2225368   | C   | T   | p.L485L  | -      | -      | Y                         | synonymous            | TRAF7   |
| Quad18 | Proband | chr16 | SNV  | 3023235   | G   | A   | p.L444F  | -      | -      | N                         | nonsynonymous         | PKMYT1  |
| Quad18 | Proband | chr2  | SNV  | 101638833 | G   | A   | p.H876Y  | -      | -      | Y                         | nonsynonymous         | TBC1D8  |
| Quad18 | Proband | chr12 | SNV  | 64519788  | T   | C   | p.F752F  | -      | -      | Y                         | synonymous            | SRGAP1  |
| Quad18 | Proband | chr14 | SNV  | 65237617  | G   | T   | p.T1928T | -      | -      | Y                         | synonymous            | SPTB    |
| Quad19 | Proband | chr1  | SNV  | 43228142  | T   | C   | p.N157S  | -      | -      | Y                         | nonsynonymous         | LEPRE1  |
| Quad19 | Proband | chr16 | SNV  | 4702048   | G   | A   | p.V98M   | -      | 8.1E-6 | Y                         | nonsynonymous         | MGRN1   |
| Quad20 | Proband | chr15 | SNV  | 34537570  | G   | A   | p.T611I  | -      | -      | Y                         | nonsynonymous         | SLC12A6 |
| Trio1  | Proband | chr8  | SNV  | 30651593  | C   | T   | p.G193D  | -      | -      | Y                         | nonsynonymous         | PPP2CB  |
| Trio3  | Proband | chr11 | SNV  | 59190311  | G   | A   | p.T39M   | 9.8E-5 | 9.8E-5 | N                         | nonsynonymous         | OR5A2   |
| Trio3  | Proband | chr7  | SNV  | 117407153 | A   | T   | p.D952E  | -      | -      | Y                         | nonsynonymous         | CTTNBP2 |
| Trio4  | Proband | chr19 | SNV  | 54599121  | G   | A   | p.A228V  | -      | -      | N                         | nonsynonymous         | OSCAR   |
| Trio4  | Proband | chr4  | SNV  | 6302743   | T   | G   | p.H407Q  | 8.2E-6 | 8.1E-6 | Y                         | nonsynonymous         | WFS1    |
| Trio4  | Proband | chr18 | SNV  | 44560405  | G   | A   | p.Q411X  | -      | -      | N                         | stopgain              | TCEB3B  |
| Trio5  | Proband | chr7  | SNV  | 138266452 | G   | A   | p.R910H  | 8.2E-6 | 4.1E-6 | Y                         | nonsynonymous         | TRIM24  |
| Trio6  | Proband | chr1  | SNV  | 62588713  | A   | T   | p.T1676S | -      | -      | Y                         | nonsynonymous         | INADL   |
| Trio7  | Proband | chr13 | SNV  | 97639686  | G   | A   | p.R110C  | 7.4E-5 | 6.9E-5 | Y                         | nonsynonymous         | OXGR1   |
| Trio7  | Proband | chr9  | SNV  | 33933540  | T   | C   | p.T686A  | -      | -      | N                         | nonsynonymous         | UBAP2   |

|        |         |       |       |           |   |   |          |        |        |   |               |                |
|--------|---------|-------|-------|-----------|---|---|----------|--------|--------|---|---------------|----------------|
| Trio8  | Proband | chr4  | SNV   | 145041693 | G | C | p.T29S   | -      | -      | N | nonsynonymous | <i>GYP A</i>   |
| Trio10 | Proband | chr6  | Indel | 118015345 | - | A | NA       | -      | -      | Y | splicing      | <i>NUS1</i>    |
| Trio16 | Proband | chr6  | SNV   | 129636689 | G | C | p.K1208N | -      | -      | Y | nonsynonymous | <i>LAMA2</i>   |
| Trio17 | Proband | chr2  | SNV   | 20182229  | T | C | p.H70R   | -      | -      | Y | nonsynonymous | <i>WDR35</i>   |
| Trio17 | Proband | chr9  | SNV   | 35558225  | A | G | p.N1031S | -      | 4.1E-6 | Y | nonsynonymous | <i>RUSC2</i>   |
| Trio17 | Proband | chr12 | SNV   | 11338711  | G | A | p.S278L  | -      | 8.1E-6 | N | nonsynonymous | <i>TAS2R42</i> |
| Trio18 | Proband | chr2  | SNV   | 55490814  | C | T | p.A61T   | -      | -      | N | nonsynonymous | <i>MTIF2</i>   |
| Trio18 | Proband | chr3  | SNV   | 157131859 | A | G | p.P239P  | 8.2E-6 | 4.1E-6 | Y | synonymous    | <i>VEP H1</i>  |

All the variants were not found in dbSNP137 and 1000 Genomes project. \*GRCh37 (hg19) human reference genome. # Conservation scores were calculated by phastCons. splicing+: predicted splice site. Pheno: phenotype (proband or siblings). Ref: reference allele. Alt: alternative allele. AAC: amino acid change. § One trio was removed prior to further analysis due to its exceedance of Mendelian errors

**Table S2.** *De novo* mutations confirmed in the 38 probands<sup>§</sup>.

| Fam_id | Pheno   | Chr   | Type | Position* | Ref | Alt | AAC      | ExaC   | gnomAD | Conservation <sup>#</sup> | Function      |
|--------|---------|-------|------|-----------|-----|-----|----------|--------|--------|---------------------------|---------------|
| Quad2  | Sibling | chrX  | SNV  | 70357214  | G   | A   | p.R1910H | -      | -      | Y                         | nonsynonymous |
| Quad3  | Sibling | chr6  | SNV  | 46657771  | A   | G   | p.K636E  | -      | -      | Y                         | nonsynonymous |
| Quad3  | Sibling | chr3  | SNV  | 52547914  | C   | T   | p.R1122X | 8.4E-6 | 8.2E-6 | N                         | stopgain      |
| Quad3  | Sibling | chr1  | SNV  | 176852015 | C   | A   | p.L1114L | -      | -      | Y                         | synonymous    |
| Quad4  | Sibling | chr3  | SNV  | 170828652 | C   | T   | p.R712Q  | 3.0E-5 | 3.1E-5 | Y                         | nonsynonymous |
| Quad5  | Sibling | chr10 | SNV  | 104181111 | G   | T   | p.R18S   | -      | -      | Y                         | splicing+     |
| Quad6  | Sibling | chr16 | SNV  | 20638526  | A   | G   | p.I471T  | -      | -      | Y                         | nonsynonymous |
| Quad7  | Sibling | chr19 | SNV  | 10205574  | C   | A   | p.R208L  | 8.2e-6 | -      | N                         | nonsynonymous |
| Quad7  | Sibling | chr8  | SNV  | 113318282 | T   | C   | p.Q2635Q | -      | -      | Y                         | synonymous    |
| Quad9  | Sibling | chr1  | SNV  | 63789444  | C   | G   | p.R239G  | 8.2e-6 | -      | Y                         | nonsynonymous |
| Quad13 | Sibling | chr4  | SNV  | 71346641  | A   | G   | p.R60R   | 8.2E-6 | 4.1E-6 | N                         | synonymous    |
| Quad14 | Sibling | chr2  | SNV  | 96781599  | G   | A   | p.T97I   | -      | -      | Y                         | nonsynonymous |
| Quad14 | Sibling | chr20 | SNV  | 62705375  | C   | T   | p.R162Q  | 1.7E-5 | 1.2E-5 | Y                         | nonsynonymous |
| Quad14 | Sibling | chr5  | SNV  | 5235236   | G   | A   | p.E654K  | 1.7E-5 | 8.1E-6 | Y                         | nonsynonymous |
| Quad14 | Sibling | chr17 | SNV  | 7256378   | C   | T   | p.F39F   | -      | 4.1E-6 | Y                         | synonymous    |
| Quad15 | Sibling | chr12 | SNV  | 57677634  | C   | T   | p.G368S  | 4.1E-5 | 2.4E-5 | Y                         | nonsynonymous |
| Quad15 | Sibling | chr17 | SNV  | 74398741  | G   | A   | p.L210L  | 1.6E-5 | 1.2E-5 | Y                         | synonymous    |
| Quad16 | Sibling | chr6  | SNV  | 131917740 | C   | T   | p.R905Q  | -      | 4.1E-6 | Y                         | nonsynonymous |
| Quad19 | Sibling | chr15 | SNV  | 80847418  | A   | G   | p.K368E  | -      | -      | Y                         | nonsynonymous |

All the variants were not found in dbSNP137 and 1000 Genomes project. \*GRCh37 (hg19) human reference genome. # Conservation scores were calculated by phastCons. splicing+: predicted splice site. Pheno: phenotype (probands or siblings). Ref: reference allele. Alt: alternative allele. AAC: amino acid change.

**Table S3.** *De novo* mutations confirmed in the 20 siblings.

|          | Subjects<br>(#dnMs) | dnMR     | nsMR     | dnMs<br>per sample | nsMs<br>per sample | P value |
|----------|---------------------|----------|----------|--------------------|--------------------|---------|
| Probands | 38(39)              | 1.67E-08 | 1.46E-08 | 1.03               | 0.89               | 0.50    |
| Siblings | 20(19)              | 155E-08  | 1.14E-08 | 0.95               | 0.70               | -       |
| Total    | 58(58)              | 1.63E-08 | 1.35E-08 | 1.00               | 0.83               | 0.52    |

\*Nonsynonymous mutations include nonsense, missense mutations, and the mutations in splicing sites; dnMs, de novo mutations; dnMR, de novo mutation rate; nsMs, nonsynonymous mutations; P value, from Fisher’s exact test.

**Table S4.** The *de novo* mutation rate between probands and siblings. There is no significant difference between them.

|                                              | Probands   |             | Siblings   |            |
|----------------------------------------------|------------|-------------|------------|------------|
| The number of <i>de novo</i> mutations       | 0 (n=14)   | ≥1 (n=24)   | 0 (n=8)    | ≥1 (n=12)  |
| Male subjects (%)                            | 8 (57.14%) | 14 (58.33%) | 5 (62.50%) | 7 (58.33%) |
| PD age at onset (average age/year)           | 29.07      | 31.71       | -          | -          |
| Paternal childbearing age (average age/year) | 27.71      | 28.5        | 28.75      | 29.08      |
| Maternal childbearing age (average age/year) | 25.29      | 25.21       | 25.29      | 25.21      |

**Table S5A.** Basic descriptive statistics.

| Sample characteristics | P value (Wilcoxon Rank Sum test, one tail) |
|------------------------|--------------------------------------------|
|------------------------|--------------------------------------------|

|                           | $P_0+P_1$ vs. $S_0+S_1$ | $P_0$ vs. $P_1$ | $S_0$ vs. $S_1$ | $P_0+S_0$ vs. $P_1+S_1$ |
|---------------------------|-------------------------|-----------------|-----------------|-------------------------|
| PD age at onset           | -                       | 0.96            | -               | -                       |
| Paternal childbearing age | 0.82                    | 0.27            | 0.36            | 0.28                    |
| Maternal childbearing age | 0.63                    | 0.49            | 0.44            | 0.48                    |

$P_0$ : probands without de novo mutations;  $P_1$ : probands with *de novo* mutations;

$S_0$ : siblings without de novo mutations;  $S_1$ : siblings with *de novo* mutations

**Table S5B.** The evaluation 1. PD age at onset, and 2. Parental childbearing age between the subjects with or without *de novo* mutations by Wilcoxon rank sum test.

| Sample characteristics           | Probands |        | Siblings |        | Probands+Siblings |        |
|----------------------------------|----------|--------|----------|--------|-------------------|--------|
|                                  | Male     | Female | Male     | Female | Male              | Female |
| <i>De novo</i> mutation $\geq 1$ | 14       | 10     | 7        | 5      | 21                | 15     |
| <i>De novo</i> mutation =0       | 8        | 6      | 5        | 3      | 13                | 9      |
| Male vs. Female (P value)        | 0.60     |        | 0.74     |        | 0.63              |        |

**Table S5C.** Evaluations of the gender in the subjects with or without *de novo* mutations by Fisher's exact test.

**Table S5.** The comparison of offspring gender, parental childbearing age, and probands' age at onset between 1. probands, siblings, and 2. probands with or without *de novo* mutations.

|                        | Probands<br>( <i>de novo</i> mutations) | Siblings<br>( <i>de novo</i> mutations) | Probands and Siblings<br>(Private inherited mutations) |
|------------------------|-----------------------------------------|-----------------------------------------|--------------------------------------------------------|
| Nonsynonymous (NS)     | 32                                      | 14                                      | 13,878                                                 |
| Synonymous (S)         | 7                                       | 5                                       | 8,612                                                  |
| NS:S                   | 4.57                                    | 2.80                                    | 1.61                                                   |
| P value*               | <b>5.35E-3</b>                          | 0.20                                    | -                                                      |
| Odds ratio             | 4.22                                    | 1.74                                    | -                                                      |
| Loss of function (LoF) | 6                                       | 2                                       | 392                                                    |
| Missense               | 27                                      | 12                                      | 13,576                                                 |
| LoF:missense           | 0.22                                    | 0.17                                    | 0.03                                                   |
| P value                | <b>2.94E-4</b>                          | 0.06                                    | -                                                      |
| Odds ratio             | 7.69                                    | 5.77                                    | -                                                      |

Nonsynonymous mutations include nonsense, missense mutations, and the mutations in splicing sites; Loss of function mutations include frameshift, nonsense mutations, and the mutations in splicing sites. \*The significant P values calculated by Fisher's exact test are in bold.

**Table S6.** The *de novo* mutations and private inherited mutations in probands and siblings.

| Gene names     | Number of Amino Acid | RNSV Carriers<br>(Case:Control) | P value | Expressed in brain STR/SNc |
|----------------|----------------------|---------------------------------|---------|----------------------------|
| <i>NUP98</i>   | 1817                 | 39:30                           | 0.72    | Y/N                        |
| <i>MAD1L1</i>  | 718                  | 28:29                           | 0.50    | Y/N                        |
| <i>PPP2CB</i>  | 309                  | 15:9                            | 0.54    | Y/Y                        |
| <i>PKMYT1</i>  | 499                  | 24:18                           | 0.76    | Y/N                        |
| <i>TRIM24</i>  | 393                  | 4:5                             | 0.74    | Y/Y                        |
| <i>CTTNBP2</i> | 639                  | 99:69                           | 0.23    | Y/Y                        |
| <i>NUS1</i>    | 293                  | 6:0                             | 0.03    | Y/Y                        |
| <i>SMPD3</i>   | 655                  | 30:25                           | 1       | Y/Y                        |
| <i>MGRN1</i>   | 552                  | 35:28                           | 0.90    | Y/Y                        |
| <i>RUSC2</i>   | 1516                 | 31:26                           | 1       | Y/Y                        |
| CEP131         | 1083                 | 71:54                           | 0.58    | Y/Y                        |

|              |     |       |      |     |
|--------------|-----|-------|------|-----|
| <i>IFI35</i> | 286 | 18:14 | 0.86 | Y/Y |
|--------------|-----|-------|------|-----|

**Table S7A.** Replication of 12 candidate genes in 1,852 cases and 1,565 controls.

|                     | Cases | RNSV Carriers<br>(Case) | Controls | RNSV Carriers<br>(control) | P value |
|---------------------|-------|-------------------------|----------|----------------------------|---------|
| <b>Replication1</b> | 1,852 | 6                       | 1,565    | 0                          | 0.03    |
| <b>Replication2</b> | 3,237 | 20                      | 2,858    | 2                          | 3.2E-4  |
| <b>Combined</b>     | 5,089 | 26                      | 4,423    | 2                          | 1.01E-5 |

**Table S7B.** Replication of *NUS1* on two case-control cohorts.

**Table S7. Replication of candidate genes carrying *de novo* mutations.** The P values were calculated by Fisher's exact test and the significant P values from were in bold. RNSV: Rare NonSynonymous Variant.

| GEO ID   | No. of PD mice | No. of Control mice | Description                                                                                                                                      |
|----------|----------------|---------------------|--------------------------------------------------------------------------------------------------------------------------------------------------|
| GSE4788  | 15             | 8                   | Dysregulation of Gene Expression in the 1-Methyl-4-Phenyl-1,2,3,6-Tetrahydropyridine-Lesioned Mouse Substantia Nigra                             |
| GSE7707  | 6              | 6                   | Gene expression changes in multiple brain regions of a mouse MPTP model of Parkinson's disease                                                   |
| GSE20547 | 7              | 12                  | A53T- $\alpha$ -synuclein overexpression mouse model signaling and striatal synaptic plasticity                                                  |
| GSE60414 | 12             | 12                  | Potential of neurotoxicity in double mutant mice with Pink1 ablation and A53T- <i>SNCA</i> overexpression                                        |
| GSE60413 | 24             | 23                  | Parkinson Phenotype in Aged <i>PINK1</i> -Deficient Mice Is Accompanied by Progressive Mitochondrial Dysfunction in Absence of Neurodegeneration |
| GSE52584 | 12             | 12                  | Gene and microRNA transcriptome analysis of Parkinson's related <i>LRRK2</i> mouse models                                                        |

**Table S8A.** The gene expression datasets collected from GEO to calculate the differential expression between PD mice and control mice for the candidate genes in protein-protein interaction networks.

| Gene names     | Adjusted P value |
|----------------|------------------|
| <i>CTTNBP2</i> | 3.01E-02         |

|               |          |
|---------------|----------|
| <i>MAD1L1</i> | 1.47E-02 |
| <i>NUP98</i>  | 4.87E-03 |
| <i>NUS1</i>   | 8.84E-03 |
| <i>PKMYT1</i> | 5.92E-02 |
| <i>PPP2CB</i> | 5.64E-03 |
| <i>TRIM24</i> | 3.46E-03 |

**Table S8B.** The smallest adjusted P value of candidate genes in the protein-protein interaction network in six expression datasets.

**Table S8.** The differential expression of genes involved in the protein-protein interaction networks.

| Chr  | Position* | Ref | Alt | ExAC   | gnomAD | Conservation <sup>#</sup> | RNSV<br>Carriers<br>(Case) | RNSV<br>Carriers<br>(Control) |
|------|-----------|-----|-----|--------|--------|---------------------------|----------------------------|-------------------------------|
| chr6 | 117996897 | C   | T   | -      | -      | Y                         | 1                          | 0                             |
| chr6 | 117996940 | T   | C   | -      | -      | Y                         | 1                          | 0                             |
| chr6 | 117996941 | C   | G   | 1.3E-5 | 1.3E-5 | Y                         | 1                          | 0                             |
| chr6 | 117997007 | G   | T   | 2.7E-4 | 2.7E-4 | Y                         | 1                          | 0                             |
| chr6 | 117997032 | C   | G   | -      | 2.5E-5 | Y                         | 1                          | 0                             |
| chr6 | 117997090 | G   | T   | 3.3E-5 | 3.3E-5 | Y                         | 3                          | 0                             |
| chr6 | 117997098 | G   | T   | -      | -      | Y                         | 1                          | 0                             |
| chr6 | 117997104 | G   | T   | -      | 3.5E-5 | Y                         | 1                          | 0                             |
| chr6 | 117997184 | C   | G   | 1.1E-5 | 1.1E-5 | Y                         | 1                          | 0                             |
| chr6 | 118014221 | T   | G   | -      | -      | Y                         | 2                          | 0                             |
| chr6 | 118014264 | C   | A   | -      | 4.1E-6 | Y                         | 1                          | 0                             |
| chr6 | 118014276 | G   | C   | 8.1E-6 | 8.1E-6 | Y                         | 4                          | 1                             |
| chr6 | 118015279 | G   | C   | -      | -      | Y                         | 2                          | 0                             |
| chr6 | 118024773 | A   | G   | -      | 8.1E-6 | Y                         | 1                          | 0                             |
| chr6 | 118024794 | T   | A   | -      | -      | Y                         | 1                          | 0                             |
| chr6 | 118024866 | G   | A   | -      | -      | Y                         | 1                          | 0                             |
| chr6 | 118028241 | G   | A   | -      | -      | Y                         | 0                          | 1                             |
| chr6 | 118028193 | A   | C   | 8.2E-6 | 8.2E-6 | N                         | 3                          | 0                             |

\*GRCh37 (hg19) human reference genome. <sup>#</sup> Conservation scores were calculated by phastCons.

**Table S9. Rare nonsynonymous variants in *NUS1* from case-control replications.**  
RNSV: Rare NonSynonymous Variant

### **Additional Data Files Content**

**Dataset S1.** Homozygous inherited variants in probands. (Excel file)

**Dataset S2.** The predicted microRNAs targets on 12 candidate genes and PD known causative genes. (Excel file)

**Dataset S3.** PD related microRNAs reported in the previous literatures<sup>17-24</sup>. (Excel file)

**Dataset S4.** The patients with *NUS1* rare variants in our study. (Excel file)

**Dataset S5.** MIPs designed for the 12 new candidate genes by MIPgen. (Excel file)

**Dataset S6.** The probands of 39 EOPD families' characteristics and phenotypic variables (Patients cohorts). (Excel file)



## Reference:

1. Yan W, *et al.* (2017) TMEM230 mutation analysis in Parkinson's disease in a Chinese population. *Neurobiol Aging* 49:219 e211-219 e213.
2. Kang JF, *et al.* (2016) RAB39B gene mutations are not linked to familial Parkinson's disease in China. *Sci Rep* 6:34502.
3. Guo JF, *et al.* (2012) VPS35 gene variants are not associated with Parkinson's disease in the mainland Chinese population. *Parkinsonism Relat Disord* 18(8):983-985.
4. Shi CH, *et al.* (2011) PLA2G6 gene mutation in autosomal recessive early-onset parkinsonism in a Chinese cohort. *Neurology* 77(1):75-81.
5. Guo JF, *et al.* (2010) Mutation analysis of Parkin, PINK1 and DJ-1 genes in Chinese patients with sporadic early onset parkinsonism. *J Neurol* 257(7):1170-1175.
6. Sun QY, *et al.* (2010) Glucocerebrosidase gene L444P mutation is a risk factor for Parkinson's disease in Chinese population. *Mov Disord* 25(8):1005-1011.
7. Hughes AJ, Daniel SE, Kilford L, & Lees AJ (1992) Accuracy of clinical diagnosis of idiopathic Parkinson's disease: a clinico-pathological study of 100 cases. *J Neurol Neurosurg Psychiatry* 55(3):181-184.
8. DePristo MA, *et al.* (2011) A framework for variation discovery and genotyping using next-generation DNA sequencing data. *Nat Genet* 43(5):491-498.
9. Woolfe A, Mullikin JC, & Elnitski L (2010) Genomic features defining exonic variants that modulate splicing. *Genome Biol* 11(2):R20.
10. Hebsgaard SM, *et al.* (1996) Splice site prediction in Arabidopsis thaliana pre-mRNA by combining local and global sequence information. *Nucleic Acids Res* 24(17):3439-3452.
11. Dogan RI, Getoor L, Wilbur WJ, & Mount SM (2007) SplicePort--an interactive splice-site analysis tool. *Nucleic Acids Res* 35(Web Server issue):W285-291.
12. Desmet FO, *et al.* (2009) Human Splicing Finder: an online bioinformatics tool to predict splicing signals. *Nucleic Acids Res* 37(9):e67.
13. Betel D, Koppal A, Agius P, Sander C, & Leslie C (2010) Comprehensive modeling of microRNA targets predicts functional non-conserved and non-canonical sites. *Genome Biol* 11(8):R90.
14. Rossin EJ, *et al.* (2011) Proteins encoded in genomic regions associated with immune-mediated disease physically interact and suggest underlying biology. *PLoS Genet* 7(1):e1001273.
15. Boyle EA, O'Roak BJ, Martin BK, Kumar A, & Shendure J (2014) MIPgen: optimized modeling and design of molecular inversion probes for targeted resequencing. *Bioinformatics* 30(18):2670-2672.

16. Nuttle X, Itsara A, Shendure J, & Eichler EE (2014) Resolving genomic disorder-associated breakpoints within segmental DNA duplications using massively parallel sequencing. *Nat Protoc* 9(6):1496-1513.
17. Wang T, *et al.* (2016) De novo genic mutations among a Chinese autism spectrum disorder cohort. *Nat Commun* 7:13316.
18. Purcell S, *et al.* (2007) PLINK: a tool set for whole-genome association and population-based linkage analyses. *Am J Hum Genet* 81(3):559-575.
19. Wu B & Pankow JS (2016) On Sample Size and Power Calculation for Variant Set-Based Association Tests. *Ann Hum Genet* 80(2):136-143.
20. Whitworth AJ, *et al.* (2005) Increased glutathione S-transferase activity rescues dopaminergic neuron loss in a *Drosophila* model of Parkinson's disease. *Proc Natl Acad Sci U S A* 102(22):8024-8029.
21. Yang Y, *et al.* (2006) Mitochondrial pathology and muscle and dopaminergic neuron degeneration caused by inactivation of *Drosophila* Pink1 is rescued by Parkin. *Proc Natl Acad Sci U S A* 103(28):10793-10798.
22. Huang X, Warren JT, Buchanan J, Gilbert LI, & Scott MP (2007) *Drosophila* Niemann-Pick type C-2 genes control sterol homeostasis and steroid biosynthesis: a model of human neurodegenerative disease. *Development* 134(20):3733-3742.
